# Supplementary material for: An unusual zig-zag 2D copper(i) coordination polymer as an outstanding catalyst for azide–alkyne “click” chemistry at room temperature
Source: Royal Society of Chemistry journal article supplement (doi:10.1039/d2dt03006c), 2022-01-01
Supplement: d2dt03006c1.pdf [file d2dt03006c1.pdf]

## Supplementary Materials for

# **An Unusual Zig-zag 2D Copper(I) Coordination Polymer as an Outstanding Catalyst for Azide-Alkyne “Click” Chemistry at Room Temperature**

Mehmet Bilgehan Bilgic<sup>a</sup>, Azra Kocaarslan<sup>a</sup>, Kerem Kaya<sup>a,b</sup>, Armagan Atsay<sup>a</sup>, Erik Svensson Grape<sup>b</sup>, Jianhong Chen<sup>b</sup>, Yusuf Yagci<sup>a,\*</sup>

<sup>a</sup>Department of Chemistry, Istanbul Technical University, Istanbul, TR-34469, Turkey

<sup>b</sup>Department of Materials and Environmental Chemistry, Stockholm University, Stockholm SE-10691, Sweden

### Table of Contents

|                                       |              |
|---------------------------------------|--------------|
| <b>1. Materials and Methods.....</b>  | <b>S2</b>    |
| <b>2. Instrumentation.....</b>        | <b>S2-3</b>  |
| <b>3. Experimental Section.....</b>   | <b>S3-4</b>  |
| <b>4. Figures and Tables.....</b>     | <b>S4-12</b> |
| <b>Supplementary References .....</b> | <b>S12</b>   |

## 1. Materials and Methods

Copper sulphate pentahydrate (Merck, 98%), benzophenone-4,4'-dicarboxylic acid (Sigma, 95%), benzyl bromide (Merck, 98%), phenyl acetylene (Sigma, 98%), propargyl amine (Sigma, 98%), propargyl alcohol (Sigma, 95%), 3-ethynylthiophene (Sigma, 98%), propargyl acrylate (Sigma, 98%), ethyl 2-bromopropionate (Sigma, 98%), 4'-Methoxy-2-chloroacetophenone (Sigma, 97%), glacial acetic acid (Merck, 100%), d-dimethyl sulfoxide, (DMSO-d<sub>6</sub>, Merck), sodium azide (NaN<sub>3</sub>, Panreac), were used as received. Propargyl acrylate (Sigma, 98%), was purified before using by basic alumina column to remove inhibitor.

## 2. Instrumentation

**Three-dimensional electron diffraction (3DED) data.** Samples were prepared by dispersing Cu(bzpd) which was then gently mortared in ethanol and drop-cast onto a copper grid covered in a holey carbon film. Three-dimensional electron diffraction (3DED) data were collected using a JEOL JEM-2100 TEM at room temperature, equipped with a Timepix detector from Amsterdam Scientific Instruments, while continuously rotating the crystal at 0.45° s<sup>-1</sup>. The experiment was carried out using Instamatic,<sup>1</sup> with data reduction performed in XDS.<sup>2</sup> The acquired intensities were then used to solve the structure with SHELXT,<sup>3</sup> and refined using SHELXL,<sup>4</sup> with previously determined electron scattering factors.<sup>5</sup> From the 3DED data, all non-hydrogen atoms could be located in the initial structure solution. The positions of hydrogen atoms were inferred on a geometrical basis.

**Powder X-ray diffraction measurements.** The sample was prepared by drop-cast on a zero-background Si disc using isopropanol and PXRD measurements were carried out using a Panalytical X'pert Pro diffractometer (Cu K $\alpha$ 1,2,  $\lambda$ 1 = 1.540598 Å,  $\lambda$ 2 = 1.544426 Å) set up in a Bragg–Brentano geometry. A Pawley refinement against of the PXRD data was carried out using TOPAS-Academic V6.6.

**Fourier-transform infrared (FTIR).** spectra were recorded on Perkin–Elmer Spectrum One spectrometer with an ATR Accessory (ZnSe, Pike Miracle Accessory) and mercury cadmium telluride (MCT) detector. Sixteen scans were averaged.

**TGA.** Thermogravimetric analysis (TGA) was performed on a Perkin-Elmer Diamond TA/TGA with a heating rate of 10 K min<sup>-1</sup> under nitrogen flow (200 mL min<sup>-1</sup>).

**SEM Measurements.** Scanning electron microscopic measurements were performed by using a Zeiss Ultra Plus field emission scanning electron microscope with EHT = 10.00 kV and probe at 200 nA. Imaging was performed using an in-lens detector for surface structure and an SE2 (Everhart-Thornley) detector for topography (Zeiss, Germany). SEM-EDX analyses were performed using the AZtecEnergy) software (Oxford Instruments, UK) linked to an Oxford detector (Oxford Instruments, UK) with an 80 mm<sup>2</sup> detection window.

**TEM Measurements.** High-angle annular dark-field (HAADF) images and corresponding energy dispersive X-ray spectroscopy with EDS mapping collected in STEM mode were collected on a JEOL-2100F.

**Liquid State NMR.** <sup>1</sup>H-NMR (500 MHz) spectra was recorded in deuterated dimethylsulfoxide (DMSO-d<sub>6</sub>) with tetramethylsilane as an internal standard on Agilent VNMR500 spectrometer at 25 °C.

### 3. Experimental Section

#### Synthesis of Azide Compounds

##### Benzyl azide

Benzyl azide was synthesized according to the literature<sup>1</sup>. Product was obtained pale yellow oil, yield 96%. <sup>1</sup>H-NMR (500 MHz, DMSO-d<sub>6</sub>) δ 7.43–7.34 (m, 5H, -C<sub>6</sub>H<sub>5</sub>), 4.43 (s, 2H, CH<sub>2</sub>-N<sub>3</sub>). FTIR: 2108 cm<sup>-1</sup>.

##### 2-Azido-1-[4-(methoxy)phenyl] ethanone

2-azido-1-[4-(methoxy)phenyl] ethanone was synthesized according to the literature.<sup>2</sup> 2-chloro-1-phenylethan-1-one (6.5 mmol) and NaN<sub>3</sub> (10 mmol) were dissolved in 3 ml water and 9 ml acetonitrile solution. After adding KI (0.33 mmol) to the solution it was stirred for 3 hours at room temperature. The reaction mixture was extracted with 50 mL EtOAc. The organic phase was wash with 2 x 30 mL of brine and lastly dried over MgSO<sub>4</sub> and evaporated to obtain yellowish solid compounds. Considering the click reactions selectivity, the material was used without further purification.

<sup>1</sup>H-NMR (500 MHz, CDCl<sub>3</sub>) δ 7.89 (d, 2H), 6.97 (d, 2H), 4.51 (s, 2H), 3.89 (d, 3H).

<sup>13</sup>C-NMR (500 MHz, CDCl<sub>3</sub>) δ 191.6, 164.2, 130.2, 127.3, 114.1, 55.5, 54.4

FT-IR (cm<sup>-1</sup>): 2898, 2121, 1681, 1593, 1512, 1452, 1242, 1167, 1025, 937, 815, 771, 624

##### Ethyl-2-azidopropionate

Ethyl-2- bromopropionate (0.015 mmol, 1 eq.) was dissolved in 200 mL DMSO and NaN<sub>3</sub> (1.5 eq.) was added in small portions to the reaction media. The solution was stirred for 3 hours at room temperature. 200 mL water was added to the reaction mixture and let down cool to room temperature. After cooling down the aqueous solution was extracted with 3 x 100 mL Et<sub>2</sub>O. The organic layers were merged and washed with 2 x 100 mL water and 100 mL brine and lastly dried over MgSO<sub>4</sub> and evaporated to yield an azide compound.

<sup>1</sup>H-NMR (500 MHz, CDCl<sub>3</sub>) δ 4.07 (m, 2H), 3.91 (m, 1H), 1.29 (d, 3H), 1.15 (t, 3H)

<sup>13</sup>C-NMR (500 MHz, CDCl<sub>3</sub>) δ 170.7, 61.4, 57.0, 16.3, 13.7

FT-IR (cm<sup>-1</sup>): 2985, 2115, 1732, 1259, 1184

##### Synthesis of 1,2,3-triazoles

Azide compound (1 mmol) and Cu(bzpdC) were placed 0.5 mL MeCN in a Pyrex tube with a magnetic stir bar, after a while alkyne compound was slowly added to the solution. The tube was placed on a magnetic stirrer for different reaction times. Reactions were followed by <sup>1</sup>H-NMR measurements for each entry and all yields were calculated according to the recorded <sup>1</sup>H-NMR spectrum.

#### 4. Figures and Tables

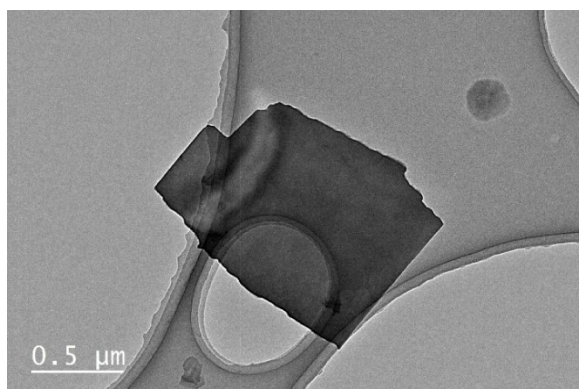

**Figure S1.** One of the six crystals studied by 3DED measurements.

**Table S1.** Crystallographic data and refinement details of Cu(bzpdC), as determined from 3DED data through a merging of 6 individual datasets.

|                                   |                                                                       |
|-----------------------------------|-----------------------------------------------------------------------|
| Empirical formula                 | C <sub>15</sub> H <sub>8</sub> Cu <sub>2</sub> O <sub>5</sub>         |
| Formula weight                    | 395.32 g mol <sup>-1</sup>                                            |
| Temperature                       | 293(2) K                                                              |
| Wavelength                        | 0.0251 Å                                                              |
| Crystal system                    | Monoclinic                                                            |
| Space group                       | P2 <sub>1</sub> /n (No. 14)                                           |
| Unit cell dimensions              | a = 3.950(8) Å<br>b = 29.930(6) Å<br>c = 12.040(2) Å<br>β = 92.96(3)° |
| Volume                            | 1421(1) Å <sup>3</sup>                                                |
| Z                                 | 4                                                                     |
| Density (calc.)                   | 1.847 g cm <sup>-3</sup>                                              |
| Index ranges                      | -4 ≤ h ≤ 4<br>-34 ≤ k ≤ 34<br>-14 ≤ l ≤ 14                            |
| Reflections collected             | 25475                                                                 |
| Completeness (0.80 Å)             | 86.7 %                                                                |
| Independent reflections           | 2486<br>[R(int) = 0.1992]                                             |
| Data / restr. / param.            | 2486/160/199                                                          |
| Goodness-of-fit on F <sup>2</sup> | 1.098                                                                 |
| Final R index [I > 2σ(I)]         | R1 = 0.1854                                                           |

**Table S2.** Crystallographic table for the Pawley refinement of Cu(bpzdc) against PXRD data.

|                           |                                                                                                                     |
|---------------------------|---------------------------------------------------------------------------------------------------------------------|
| Crystal system            | Monoclinic                                                                                                          |
| Space group               | P21/n (No. 14)                                                                                                      |
| Unit cell dimensions      | $a = 3.650(8) \text{ \AA}$<br>$b = 28.754(3) \text{ \AA}$<br>$c = 11.469(4) \text{ \AA}$<br>$\beta = 94.9(2)^\circ$ |
| Volume ( $\text{\AA}^3$ ) | 1199(3) $\text{\AA}^3$                                                                                              |
| Wavelength                | $\lambda_1 = 1.540598 \text{ \AA}$<br>$\lambda_2 = 1.544426 \text{ \AA}$                                            |
| Refinement method         | Pawley                                                                                                              |
| Refinement statistics     | Rwp = 4.27 %<br>GOF = 1.16                                                                                          |

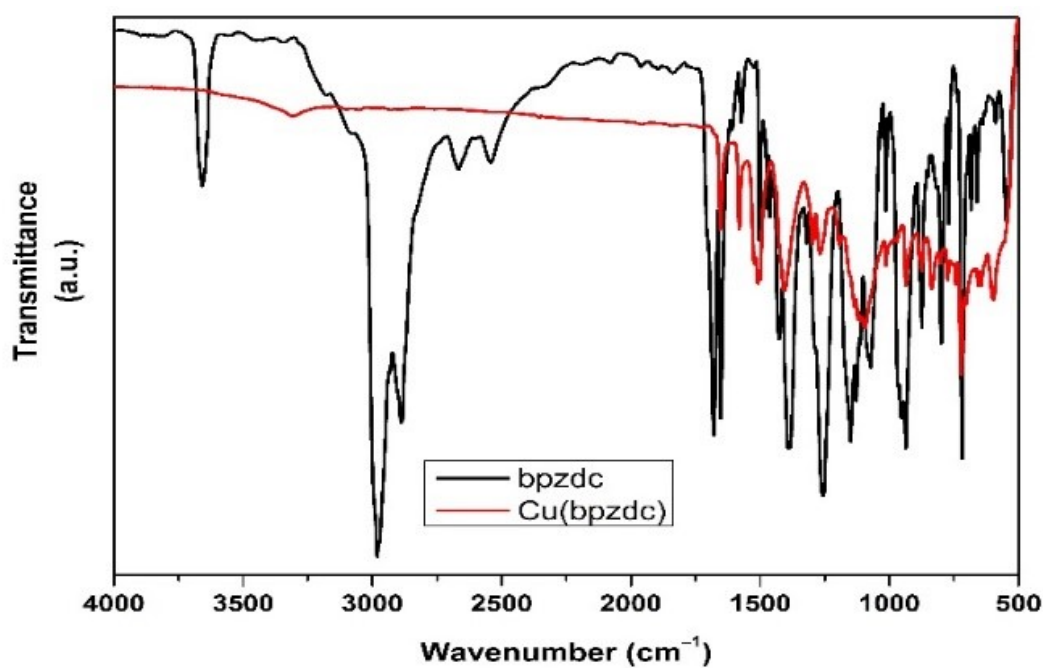

**Figure S2.** IR spectra of bpzdc (black) and Cu(bpzdc) (red).

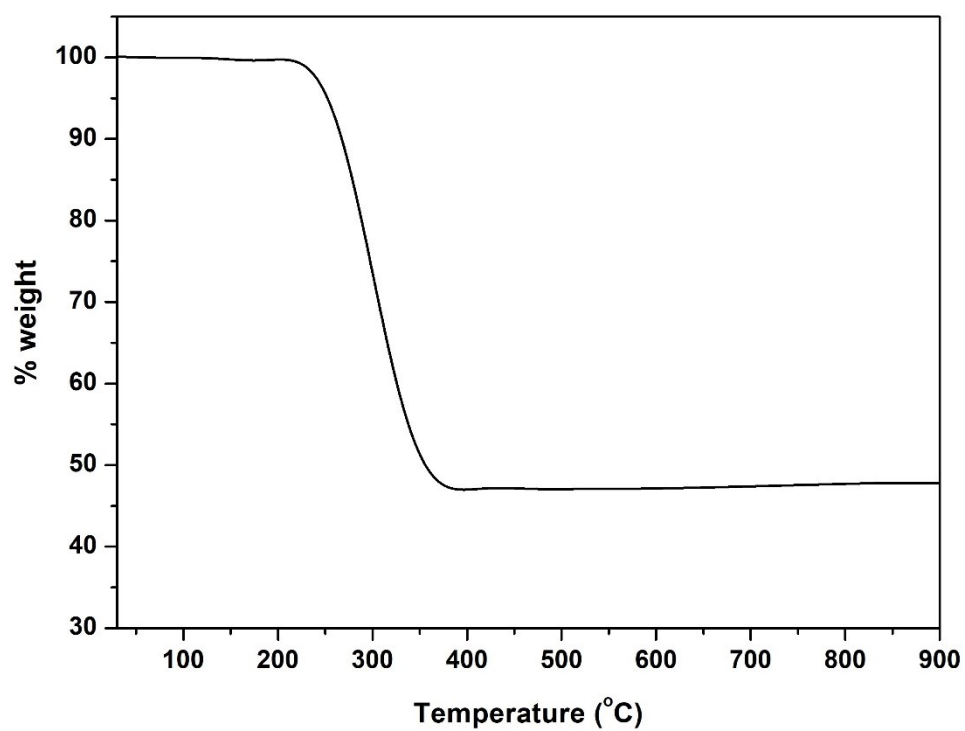

**Figure S3.** Thermogravimetric analysis of Cu(bzpdC).

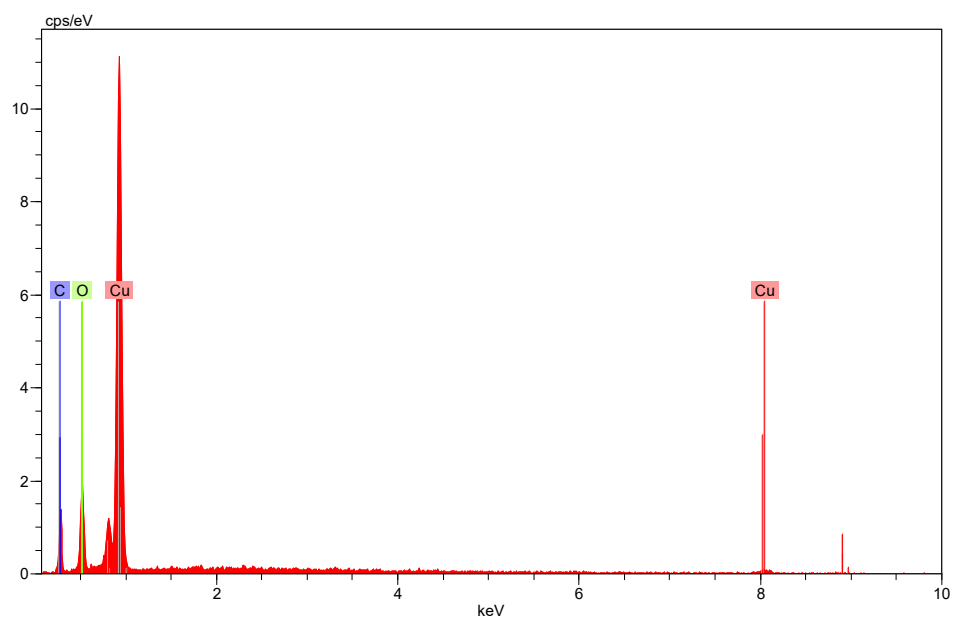

**Figure S4.** Qualitative SEM-EDX analysis of Cu(bzpdC).

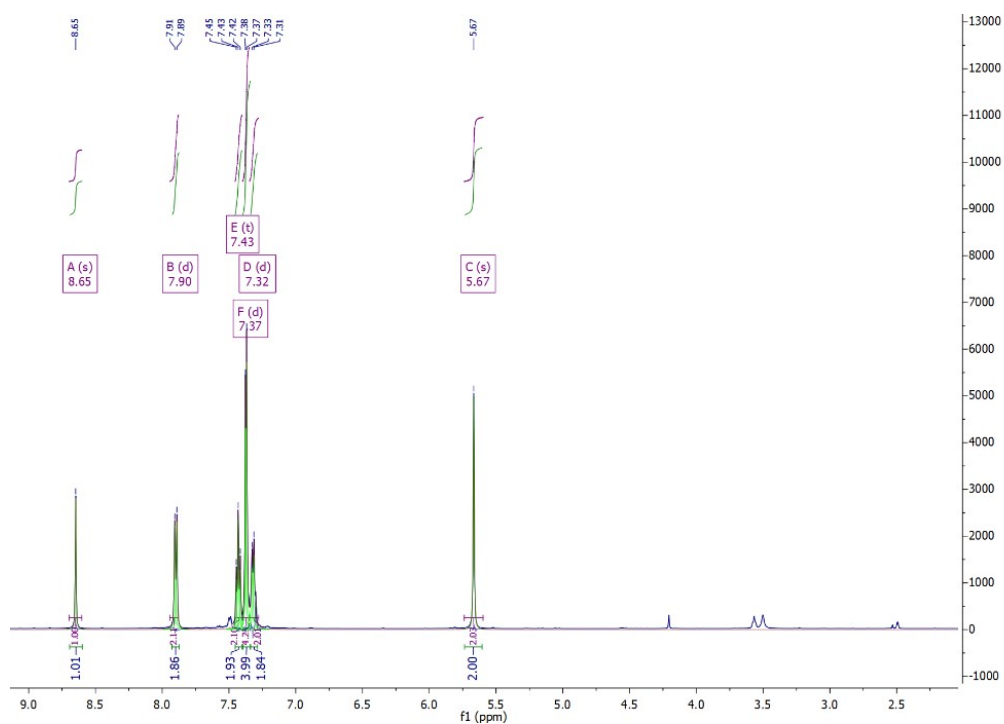

**Figure S5.** <sup>1</sup>H-NMR spectrum of 4-Benzyl-1-phenyl-1H-1,2,3-triazole.

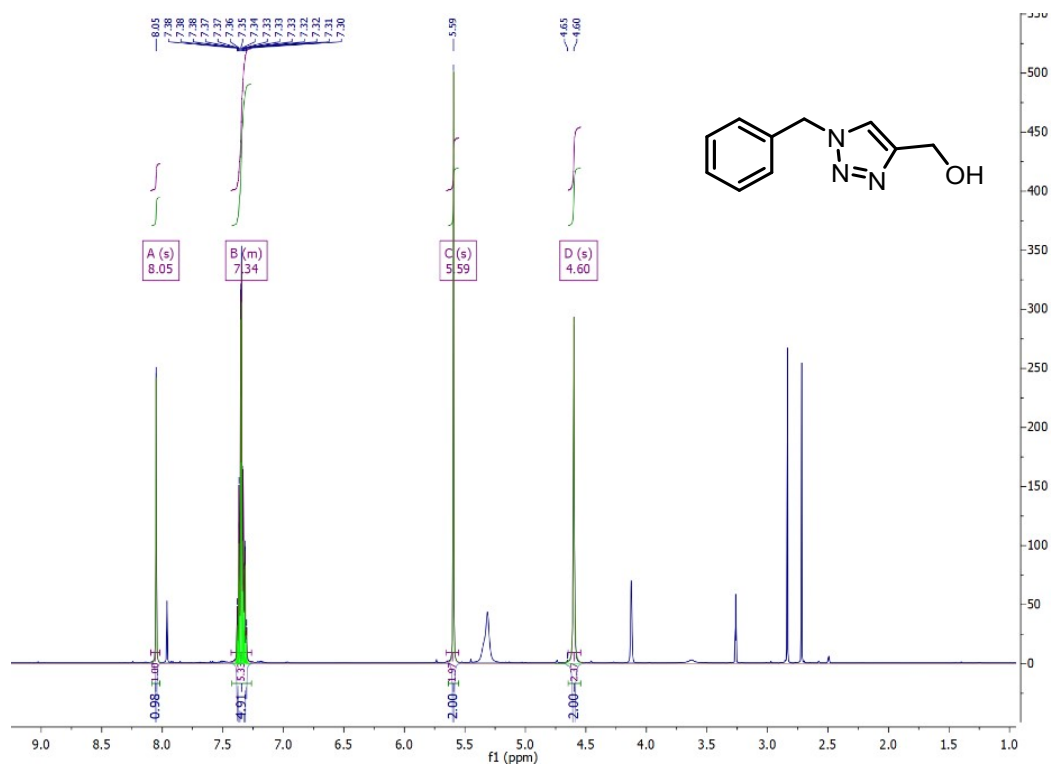

**Figure S6.**  $^1\text{H}$ -NMR spectrum of (1-Benzyl-1H-1,2,3-triazol-4-yl)methanol.

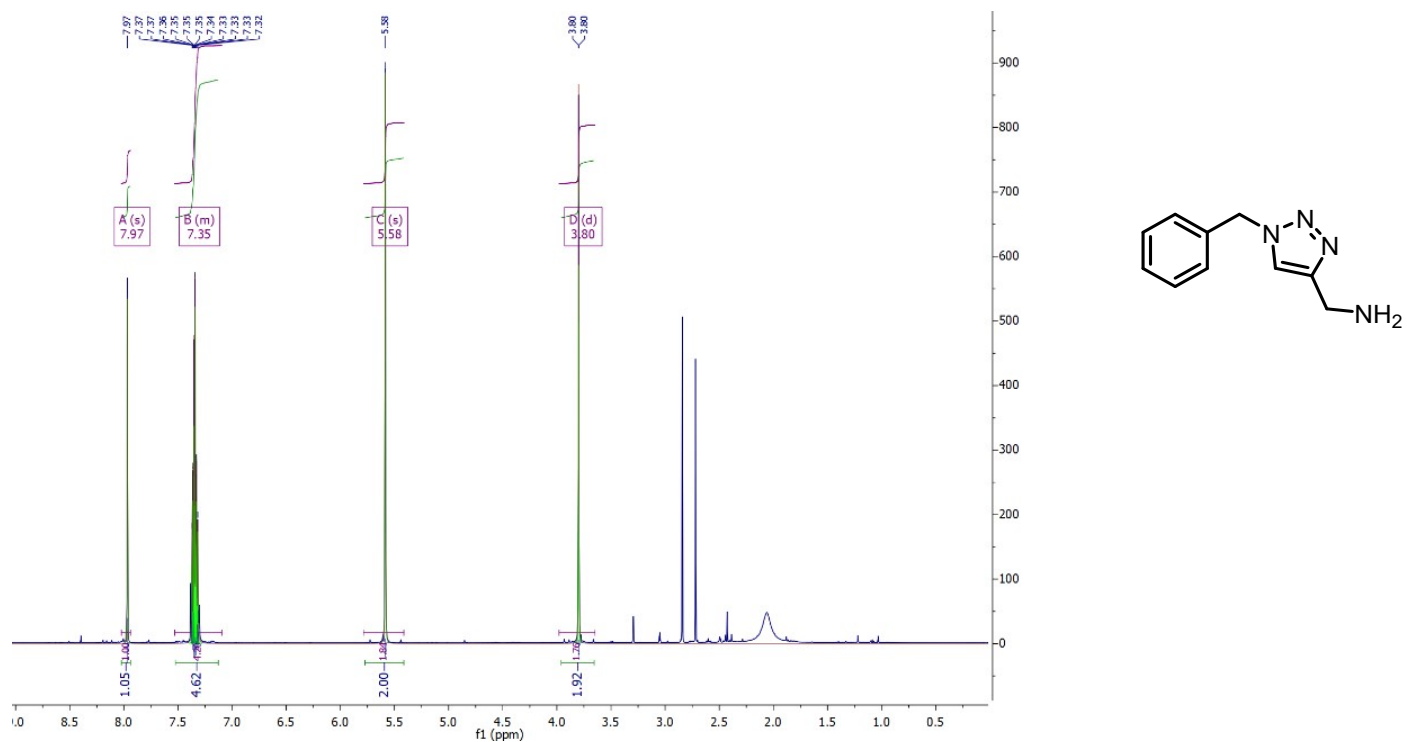

**Figure S7.**  $^1\text{H}$ -NMR spectrum of (1-Benzyl-1H-1,2,3-triazol-4-yl)methanamine.

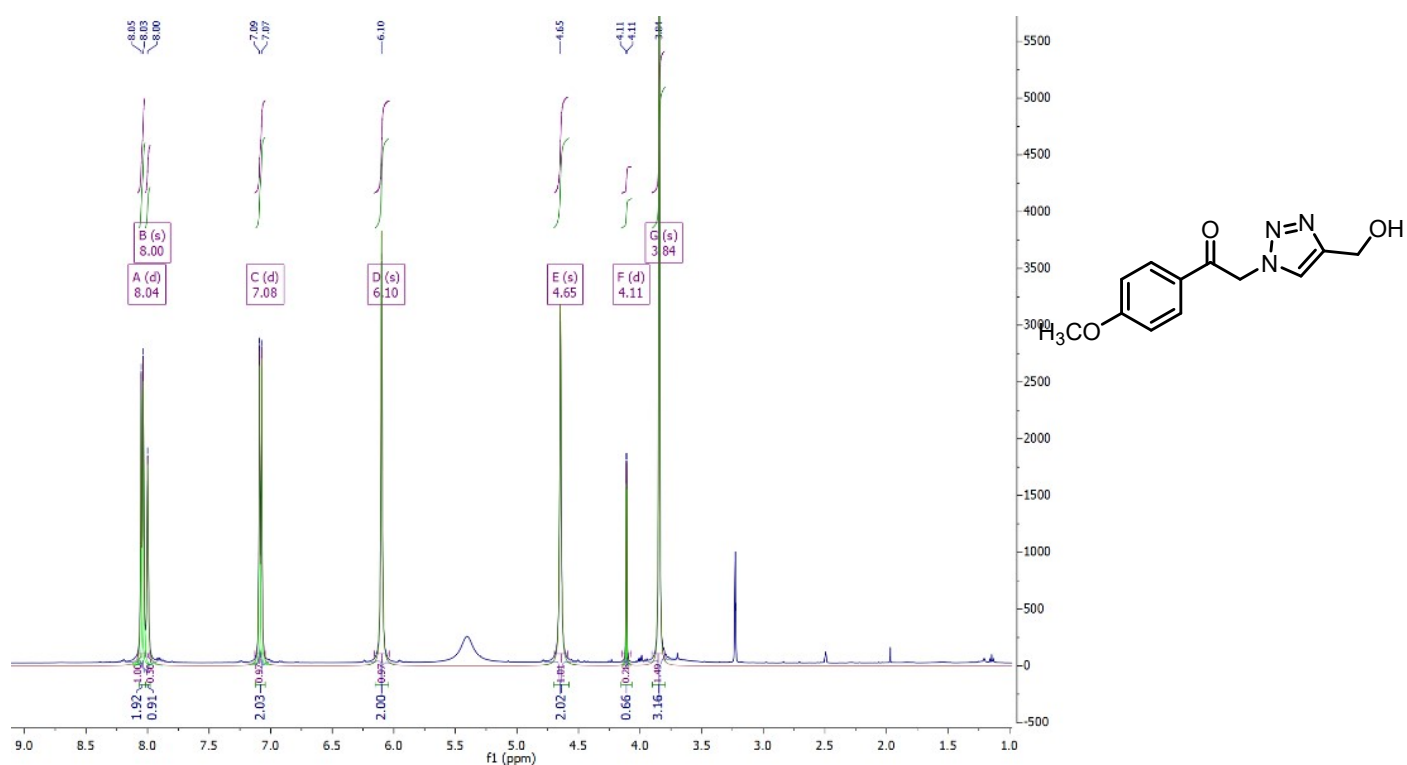

**Figure S8.**  $^1\text{H}$ -NMR spectrum of 2-(4-(hydroxymethyl)-1H-1,2,3-triazol-1-yl)-1-(4-methoxyphenyl)ethan-1-one.

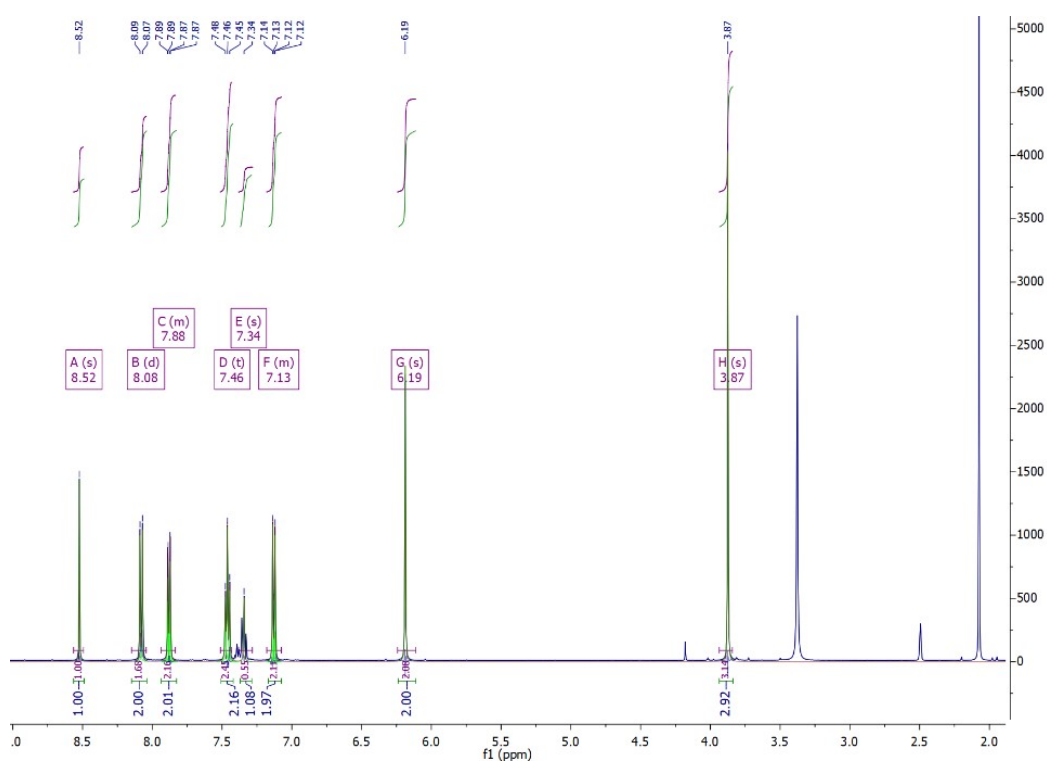

**Figure S9.**  $^1\text{H}$ -NMR spectrum of 1-(4-methoxyphenyl)-2-(4-phenyl-1H-1,2,3-triazol-1-yl)ethan-1-one.

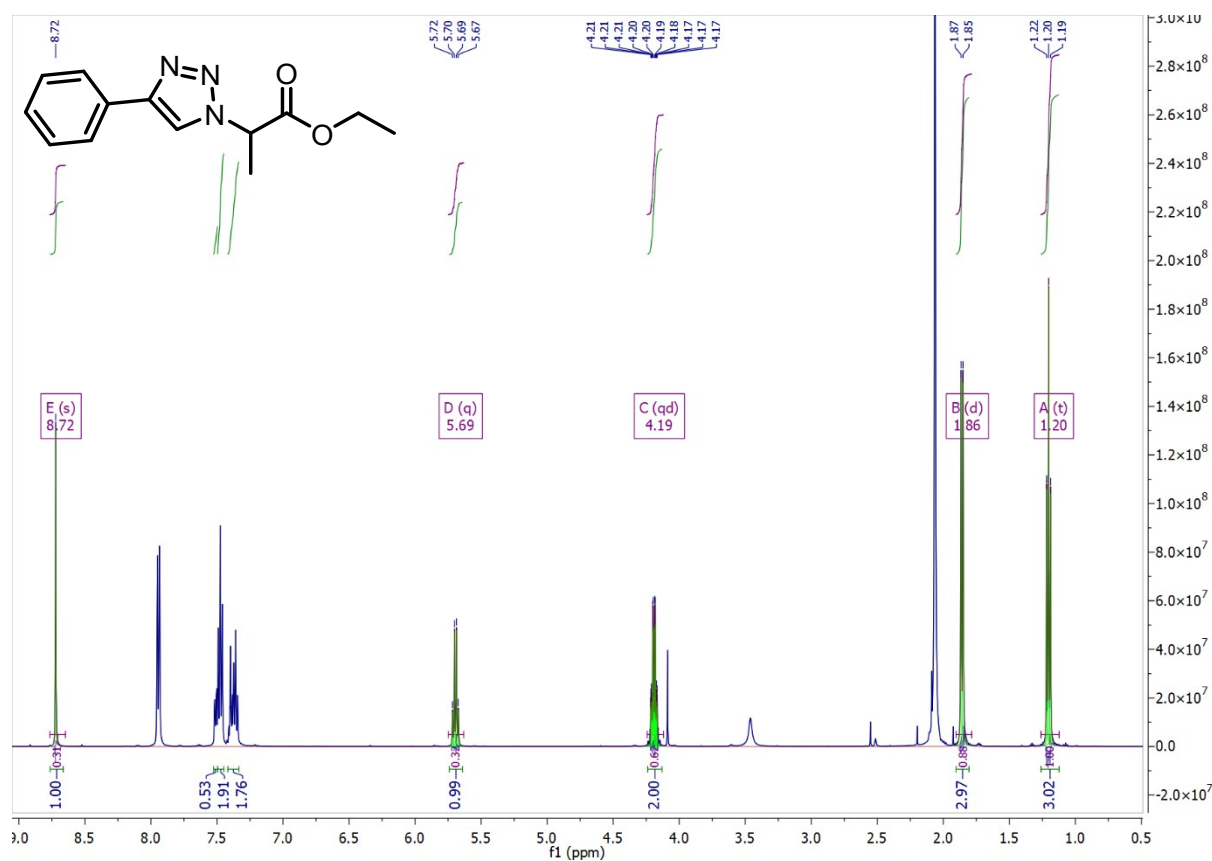

**Figure S10.**  $^1\text{H}$ -NMR spectrum of Ethyl 2-(4-phenyl-1H-1,2,3-triazol-1-yl)propanoate

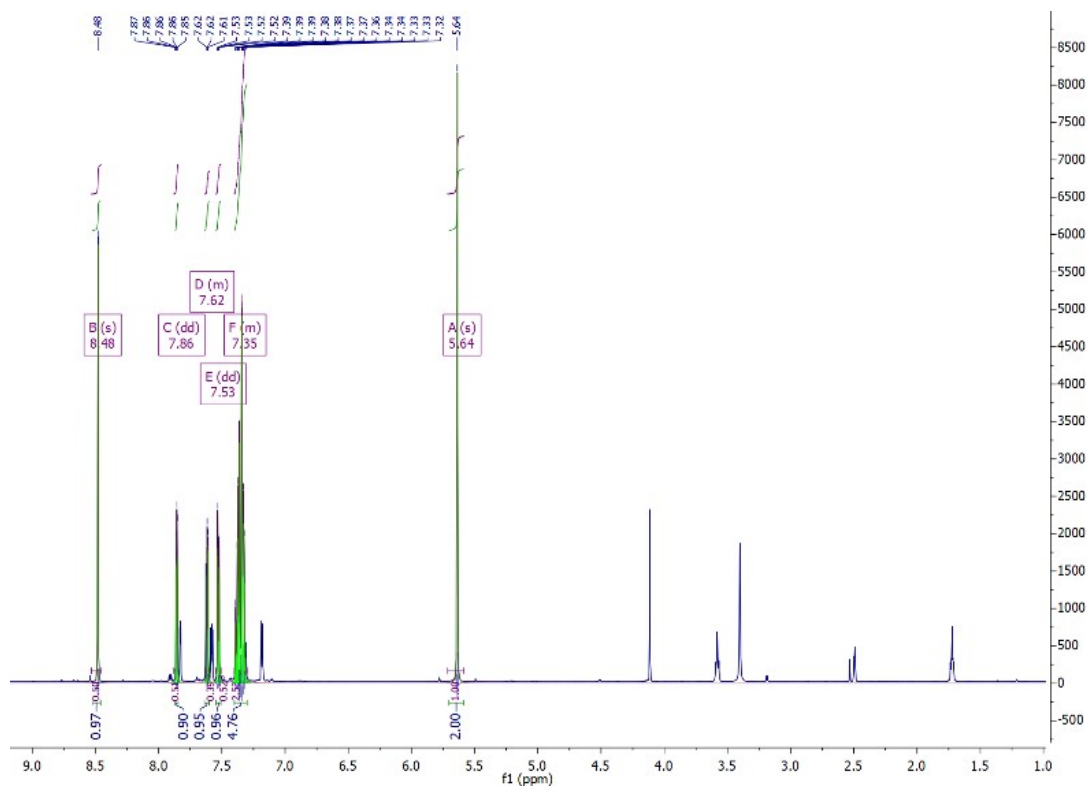

**Figure S11.**  $^1\text{H}$ -NMR spectrum of 1-Benzyl-4-(thiophen-3-yl)-1H-1,2,3-triazole.

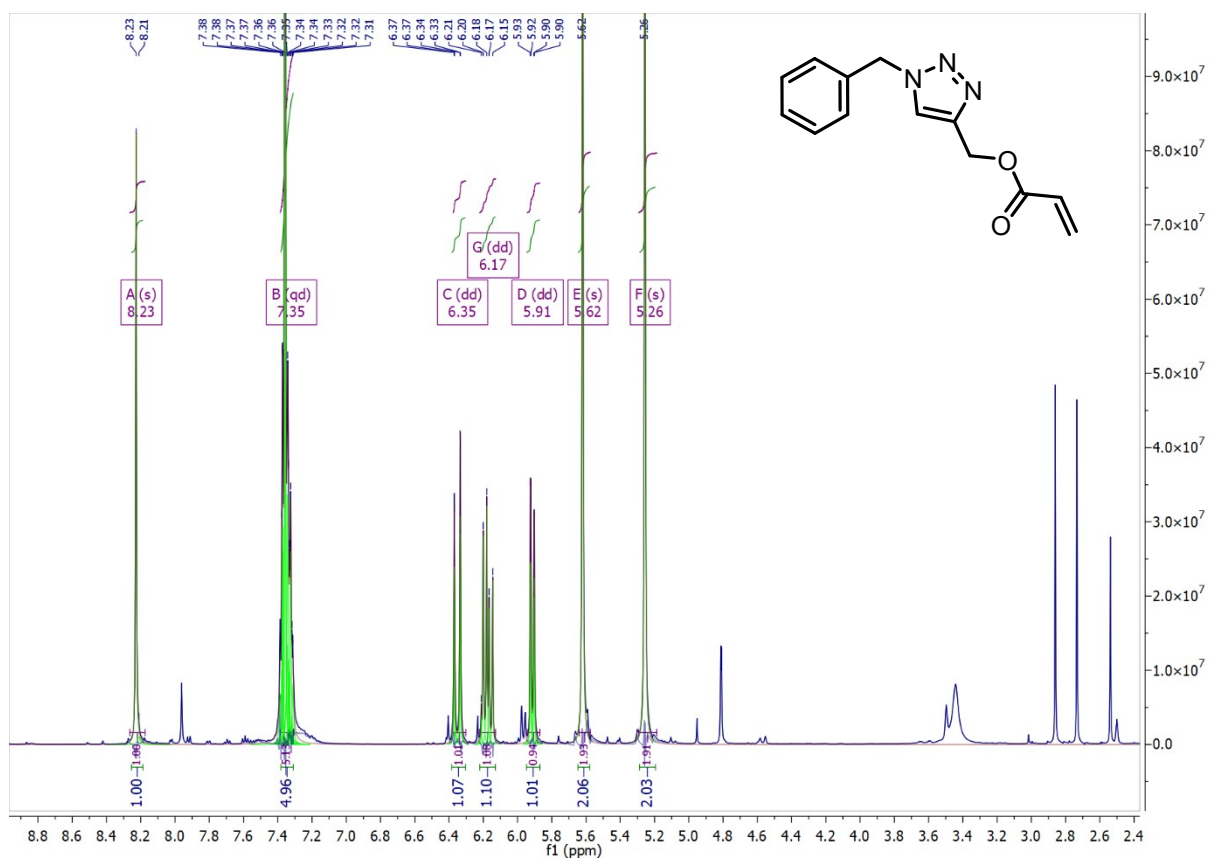

**Figure S12.**  $^1\text{H}$ -NMR spectrum of (1-Benzyl-1H-1,2,3-triazol-4-yl)methyl acrylate.

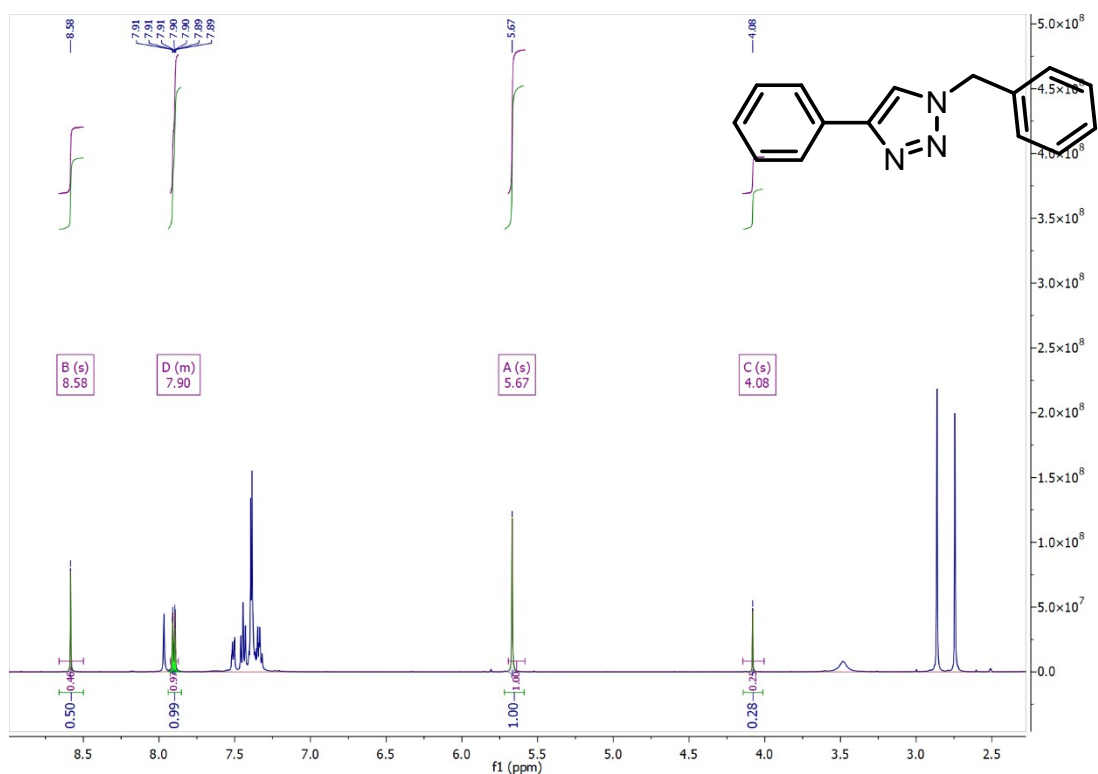

**Figure S13.**  $^1\text{H}$ -NMR spectrum of click reaction between benzyl azide and phenyl acetylene catalyzed by  $\text{Cu}(\text{OAc})_2$  in the presence of sodium ascorbate.

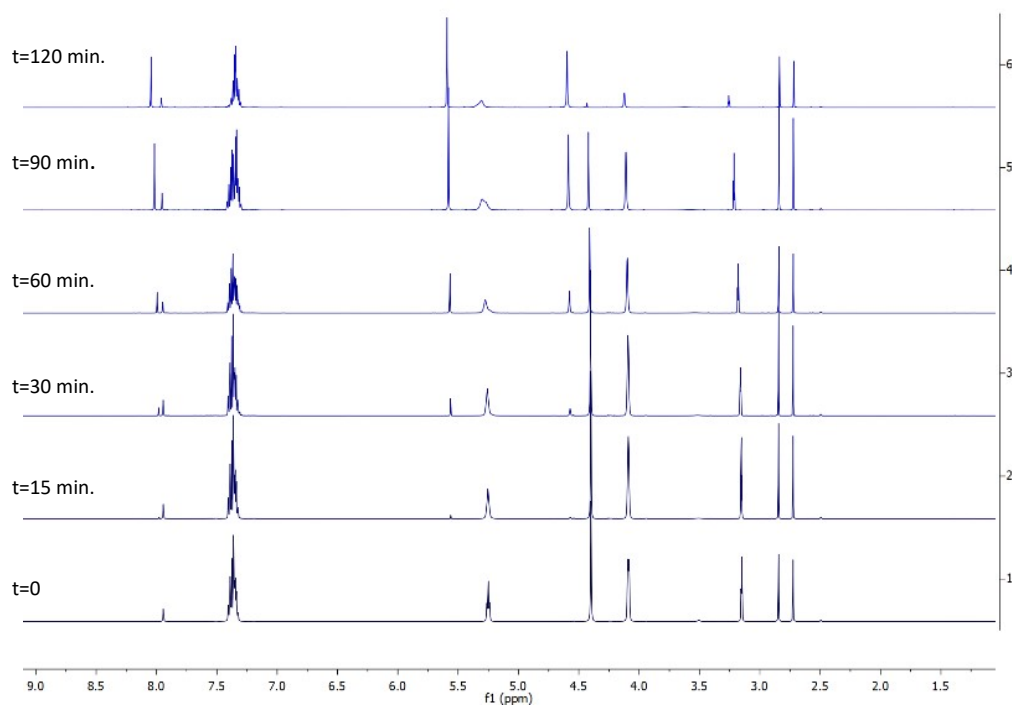

**Figure S14.**  $^1\text{H}$ -NMR spectra of entry 4 with different time intervals.

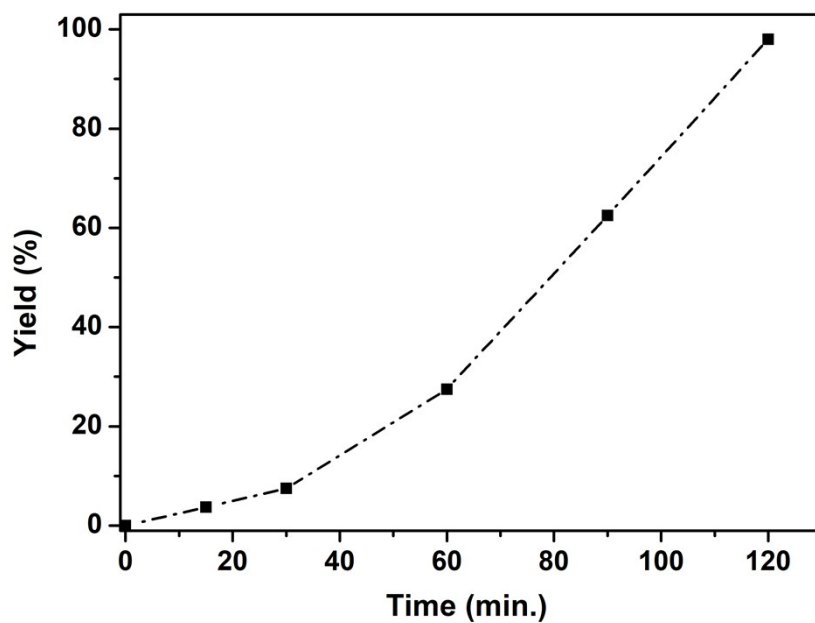

**Figure S15.** Kinetic investigation of click reaction (entry 4) catalyzed by  $\text{Cu}(\text{bzpdC})$ .

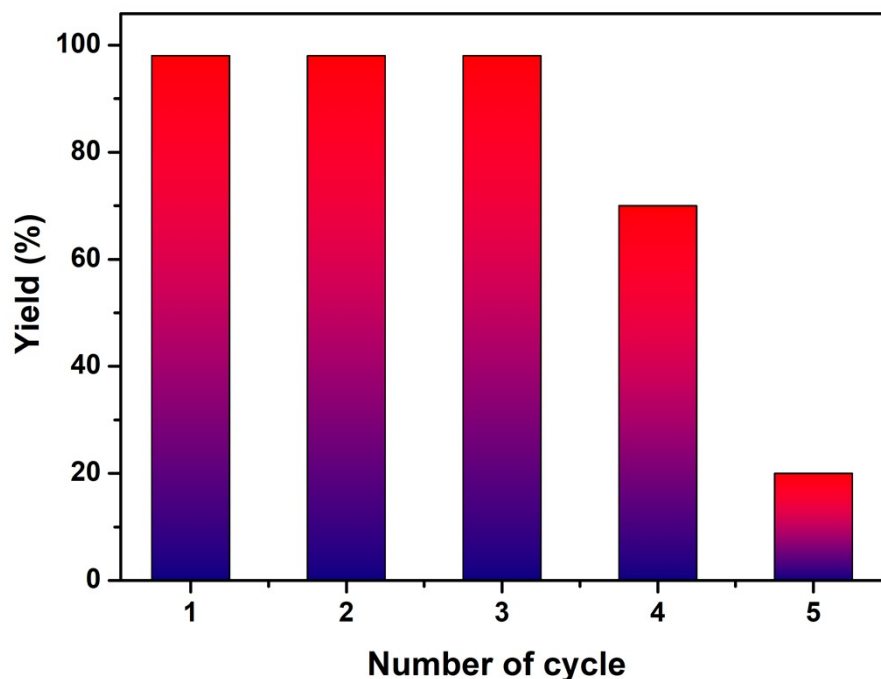

**Figure S16.** Recyclability of Cu(bzpdC) for the catalyzed click chemistry (entry 4).

### Supplementary References

- (1) Cichocka, M. O.; Ångström, J.; Wang, B.; Zou, X.; Smeets, S. High-Throughput Continuous Rotation Electron Diffraction Data Acquisition via Software Automation. *J. Appl. Crystallogr.* 2018, 51 (6), 1652–1661.
- (2) Kabsch, W. XDS. *Acta Crystallogr. Sect. D Biol. Crystallogr.* 2010, 66 (2), 125–132.
- (3) Sheldrick, G. M. SHELXT - Integrated Space-Group and Crystal-Structure Determination. *Acta Crystallogr. Sect. A Found. Crystallogr.* 2015, 71 (1), 3–8.
- (4) Sheldrick, G. M. A Short History of SHELX. *Acta Crystallogr. Sect. A Found. Crystallogr.* 2008, 64 (1), 112–122.
- (5) Peng, L. M. Electron Atomic Scattering Factors and Scattering Potentials of Crystals. *Micron* 1999, 30 (6), 625–648.
- (6) Coelho, A. TOPAS-Academic V6. Coelho Software. 2016.
- (7) Exfoliated black phosphorous-mediated CuAAC chemistry for organic and macromolecular synthesis under white LED and near-IR irradiation *Beilstein J. Org. Chem.* 2021, 17, 2477–2487.
- (8) Carbon Isotope Labeling of Carbamates by Late-Stage [ 11C], [ 13C] and [ 14C] Carbon Dioxide Incorporation, *Chemical Communications* 2020, 56, 11677-11680.
